# Supplementary material for: Bridging the gap between collective motility and epithelial–mesenchymal transitions through the active finite voronoi model
Source: Royal Society of Chemistry journal article supplement (doi:10.1039/d3sm00327b), 2023-01-01
Supplement: d3sm00327b1.zip [file d3sm00327b1.zip]

The functions were tested on MATLAB 2019b and 2022b.

```
%% set parameters
N_cell = 100; % number of cells in the system
radius = 1; % the radius of cell, i.e. 1 in the paper
phi = 0.5; % packing fraction
P0 = 4.8;
A0 = pi;
tension_difference = 0.2; % \Lambda in the paper
box_size = sqrt(N_cell*pi/phi); % box_size could be a scalar L, or a 1x2 vector [Lx, Ly]
delta_t = 0.01;

% Parameters for tissue energy, see Eq. (3) in the paper
K_P = 1*ones(N_cell, 1);
A0_list = A0*ones(N_cell, 1);
P0_list = P0*ones(N_cell, 1);

% set random seed for this demo
rng(3);

% initial the cell center positions in the center of the box
center_xy = ((rand(N_cell, 2)-0.5)*0.3+0.5)*box_size;
```

First, run molecular dynamics simulation for 30 unit time with zero motility ( $v_0=0$ ) to reach a steady state, store the cell center positions in `center_xy_zero_motility`. This relaxation takes ~3 min on my laptop.

```
tic;
for time = 0:delta_t:30
    % generate finite Voronoi configuration
    [cell_chain, edgelist, vertex_position, area_list, perimeter_list] = ...
        make_finite_voronoi_pbc(center_xy, radius, box_size);
    % calculate the interaction force
    center_force = get_finite_voronoi_force(center_xy, cell_chain, edgelist, ...
        vertex_position, radius, ones(N_cell, 1), ...
        A0_list, K_P, P0_list, tension_difference, ...
        area_list, perimeter_list, box_size);
    % update cell center positions
    center_xy = mod(center_xy + center_force*delta_t, box_size);
end
toc
```

Elapsed time is 190.638782 seconds.

```
figure, hold on, axis off
draw_finite_voronoi(cell_chain, edgelist, vertex_position, ...
    box_size, center_xy, radius)
```

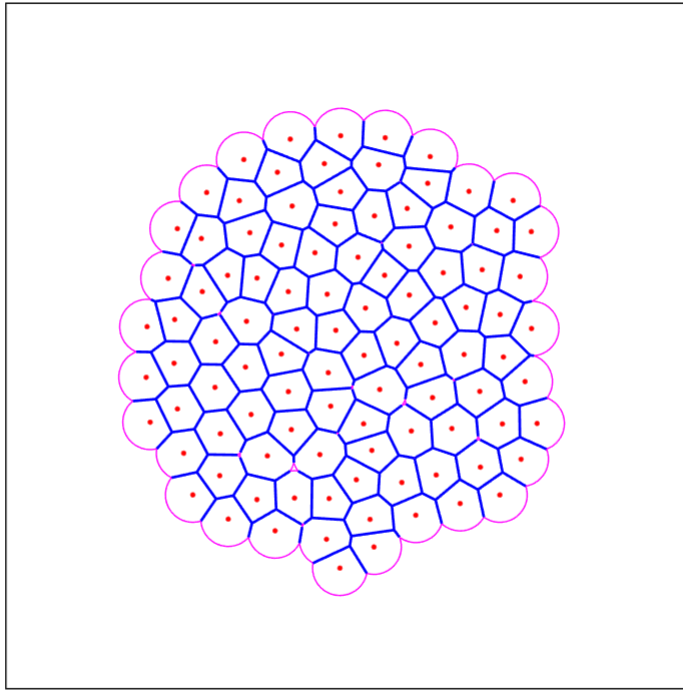

```
center_xy_zero_motility = center_xy;
```

Then we run two simulations with  $v_0=1.2$  and  $v_0=2.4$  for 10 unit time, respectively, and plot the final snapshots accordingly.

```
v0_list = [1.2, 2.4];
D_r = 0.1;

for v_idx = 1:2
    v0 = v0_list(v_idx);
    center_xy = center_xy_zero_motility;
    active_angle = rand(N_cell, 1) * 2*pi; % random initialize polarity angle

    tic;
    for time = 0:delta_t:10

        [cell_chain, edgelist, vertex_position, area_list, perimeter_list] = ...
            make_finite_voronoi_pbc(center_xy, radius, box_size);

        center_force = get_finite_voronoi_force(center_xy, cell_chain, edgelist, ...
            vertex_position, radius, ones(N_cell, 1), ...
            A0_list, K_P, P0_list, tension_difference, ...
            area_list, perimeter_list, box_size);

        active_angle = active_angle + sqrt(2*D_r * delta_t) * randn(N_cell, 1);
        active_force = v0 * [cos(active_angle) sin(active_angle)];
```

```

        center_xy = mod(center_xy + center_force*delta_t + active_force*delta_t, box_size);
    end
    toc
    figure, hold on, axis off
    draw_finite_voronoi(cell_chain, edgelist, vertex_position, ...
        box_size, center_xy, radius)
    title(['A snapshot with  $P_0=$ ', num2str(P0), ' and  $v_0=$ ', num2str(v0)])
end

```

Elapsed time is 78.161163 seconds.

**A snapshot with  $P_0=4.8$  and  $v_0=1.2$**

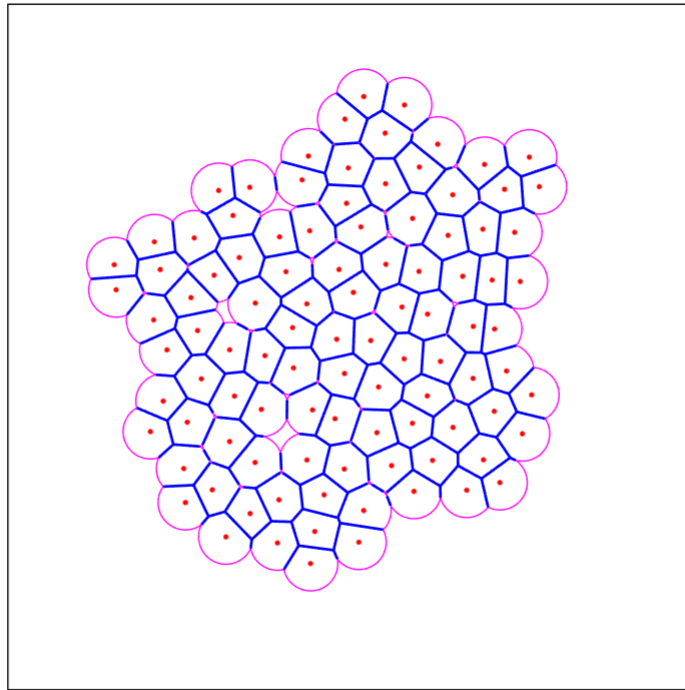

Elapsed time is 77.234963 seconds.

**A snapshot with  $P_0=4.8$  and  $v_0=2.4$**

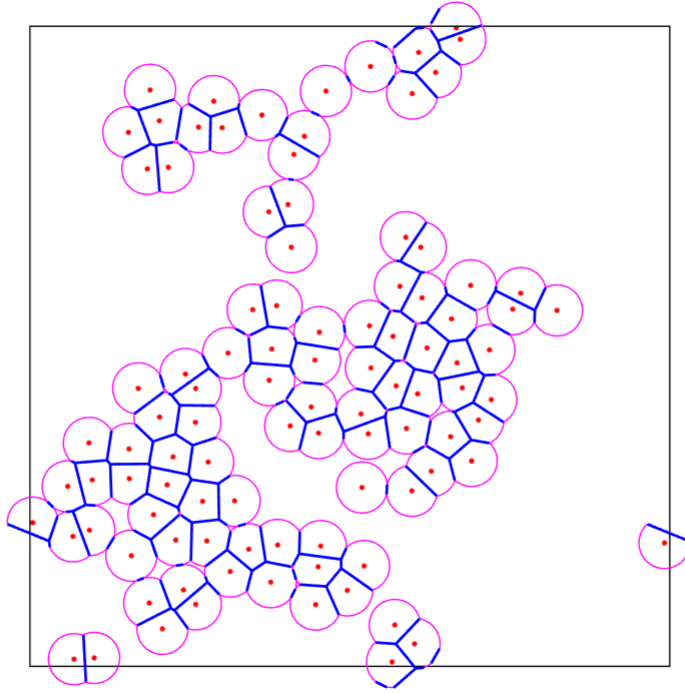

The finite Voronoi configuration information is stored in `cell_chain` (N lists of edge index indicating the corresponding rows in `edgelist`), `edgelist` (the edges could be straight edges or arc edges), and `vertex_position` (store the vertex/junction position). In addition, the `area_list` and `perimeter_list` are both N-by-1 array storing each cell's area and perimeter info.
