# Supplementary material for: Bridging the gap between collective motility and epithelial–mesenchymal transitions through the active finite voronoi model
Source: Royal Society of Chemistry journal article supplement (doi:10.1039/d3sm00327b), 2023-01-01
Supplement: d3sm00327b1.zip [file readme.docx]

The source code files included are:

- AFV_code_illustration.mlx: The main demo notebook/live script. One can easily run our code interactively and check visualization results.
- make_finite_voronoi_pbc.m: supportive function to generate finite Voronoi tissue
- get_finite_voronoi_force.m: calculate the interaction force (not include v0)
- draw_finite_voronoi.m: visualize the cells in a PBC box

To run the code, please download everything and put them in the same folder, and add the folder to your MATLAB path. Then open “AFV_code_illustration.mlx” and click the “run to end” button in your MATLAB interface. The resulting output is expected to be the same (a pdf archived version of the notebook is also provided for easy comparison).

The code is shared under CC BY 4.0 (https://creativecommons.org/licenses/by/4.0/).
