# Supplementary material for: Bridging the gap between collective motility and epithelial–mesenchymal transitions through the active finite voronoi model
Source: Royal Society of Chemistry journal article supplement (doi:10.1039/d3sm00327b), 2023-01-01
Supplement: d3sm00327b6.pdf [file d3sm00327b6.pdf]

# Supplementary Videos of “Bridging the Gap Between Collective Motility and Epithelial-Mesenchymal Transitions through the Active Finite Voronoi Model”

The videos have a frame rate of 15 frames/second, and last for 40 seconds. Each frame corresponds to an elapse of 1 unit time in the simulation.

We have attached 6 sample videos for the 6 phases, with other parameters fixed as indicated in the main text, and:

- glassy\_epithelial.mp4: The sample glassy epithelial video corresponds to  $P_0=4.4$  and  $v_0=0.2$ .
- glassy\_mesenchymal.mp4: The sample glassy mesenchymal video corresponds to  $P_0=6.4$  and  $v_0=0.1$ .
- unjammed\_epithelial.mp4: The sample unjammed epithelial video corresponds to  $P_0=4.8$  and  $v_0=1.0$ .
- unjammed\_mesenchymal.mp4: The sample unjammed mesenchymal video corresponds to  $P_0=7.2$  and  $v_0=0.7$ .
- dispersed\_epithelial.mp4: The sample dispersed epithelial video corresponds to  $P_0=4.8$  and  $v_0=1.7$ .
- dispersed\_mesenchymal.mp4: The sample dispersed mesenchymal video corresponds to  $P_0=8.2$  and  $v_0=0.8$ .
